# Supplementary material for: Novel insights intol-cysteine adsorption on transition metal doped graphene: influences of the dopant and the vacancy
Source: Royal Society of Chemistry journal article supplement (doi:10.1039/c5ra25599f), 2016-01-01
Supplement: c5ra25599f1.pdf [file c5ra25599f1.pdf]

Electronic Supplementary Material (ESI) for RSC Advances.

This journal is © The Royal Society of Chemistry 2015

## Electronic Supplementary Information

# Novel insights into L-cysteine adsorption on transition metal doped graphene: influences of the dopant and the vacancy

Huijuan Luo,<sup>a</sup> Hejun Li,<sup>\*a</sup> Zhenhai Xia,<sup>b</sup> Yanhui Chu,<sup>a</sup> Jiming Zheng,<sup>c</sup> Zhengxiong Hou<sup>d</sup>  
and Qiangang Fu<sup>\*a</sup>

<sup>a</sup>. State Key Laboratory of Solidification Processing, Carbon/Carbon Composites Research Center, Northwestern Polytechnical University, Xi'an 710072, PR China

<sup>b</sup>. Department of Chemistry, University of North Texas, Denton, TX 76203, USA

<sup>c</sup>. National Key Laboratory of Photoelectronic Technology and Functional Materials (Cultural Base), Institute of Photonics and Photo-technology, Northwest University, Xi'an 710069, PR China

<sup>d</sup>. High Performance Computing Centre, Northwestern Polytechnical University, Xi'an 710072, PR China

\*E-mail: lihejun@nwpu.edu.cn fuqiangang@nwpu.edu.cn

Tab. S1 Mulliken spin population of magnetic MSV and MDV systems. (Unit:  $\mu_B$ )

| MSV | $M_{\text{total}}$ | $M_{\text{TM}}$ | MDV | $M_{\text{total}}$ | $M_{\text{TM}}$ |
|-----|--------------------|-----------------|-----|--------------------|-----------------|
|-----|--------------------|-----------------|-----|--------------------|-----------------|

|      |       |       |      |       |       |
|------|-------|-------|------|-------|-------|
| ScSV | 0     | 0     | ScDV | 0.218 | 0.026 |
| VSV  | 0.998 | 1.156 | VDV  | 1.006 | 1.026 |
| CrSV | 2.002 | 2.435 | CrDV | 2.001 | 2.535 |
| MnS  | 2.992 | 2.819 | MnD  | 3.097 | 3.539 |
| V    |       |       | V    |       |       |
| CoSV | 0.985 | 0.293 | CoDV | 1.073 | 1.195 |
| CuSV | 1.001 | 0.275 | CuDV | 0.199 | 0.009 |

Tab. S2 Linking sites between l-cys and MGs.

|     |                   |      |                |      |      |      |      |      |      |      |
|-----|-------------------|------|----------------|------|------|------|------|------|------|------|
| MSV | Sc                | Ti   | V              | Cr   | Mn   | Fe   | Co   | Ni   | Cu   | Zn   |
| S   | S                 | S    | S              | S    | S    | S    | S    | S    | S    | S    |
| O   | Bi-O <sup>a</sup> | Bi-O | Bi-O           | Bi-O | Bi-O | Bi-O | Bi-O | Bi-O | Bi-O | Bi-O |
| N   | N                 | N    | N              | N    | N    | N    | N    | N    | N    | N    |
| MDV | Sc                | Ti   | V              | Cr   | Mn   | Fe   | Co   | Ni   | Cu   | Zn   |
| S   | S;O=              | S    | S              | S    | S    | S    | S    | S    | S    | S    |
| O   | Bi-O              | Bi-O | O <sup>b</sup> | O    | Bi-O | Bi-O | Bi-O | Bi-O | O    | O    |
| N   | N                 | N    | N              | N    | N    | N    | N    | N    | N    | N    |

<sup>a</sup>: Bi-O denotes linking sites include O in OH and O in O=.

<sup>b</sup>: O denotes the linking site is O in OH.

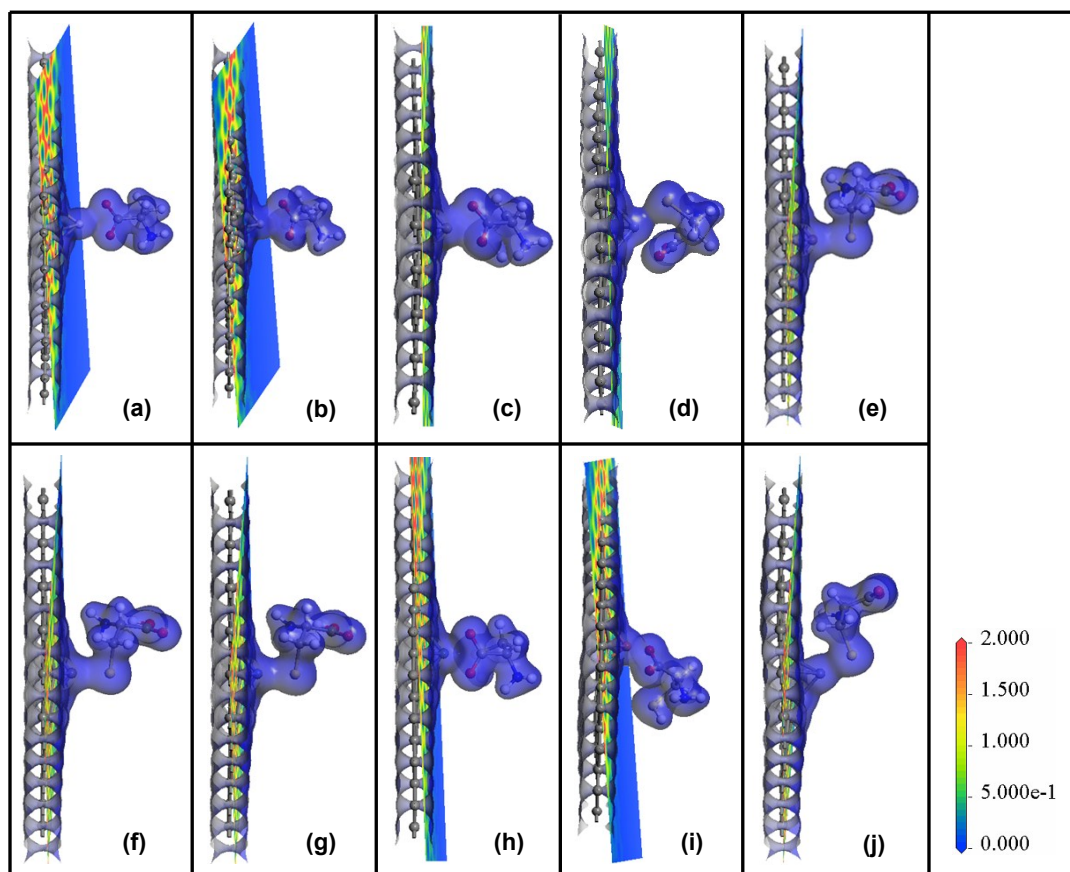

**Fig. S1** Charge density graphs of the most stable adsorption on MSVs. (a) O-ScSV, (b) O-TiSV, (c) O-VSV, (d) S-CrSV, (e) S-MnSV, (f) S-FeSV, (g) S-CoSV, (h) O-NiSV, (i) O-CuSV and (j) S-ZnSV. The electrons are shown in a range of 0-2 e Å<sup>3</sup>.

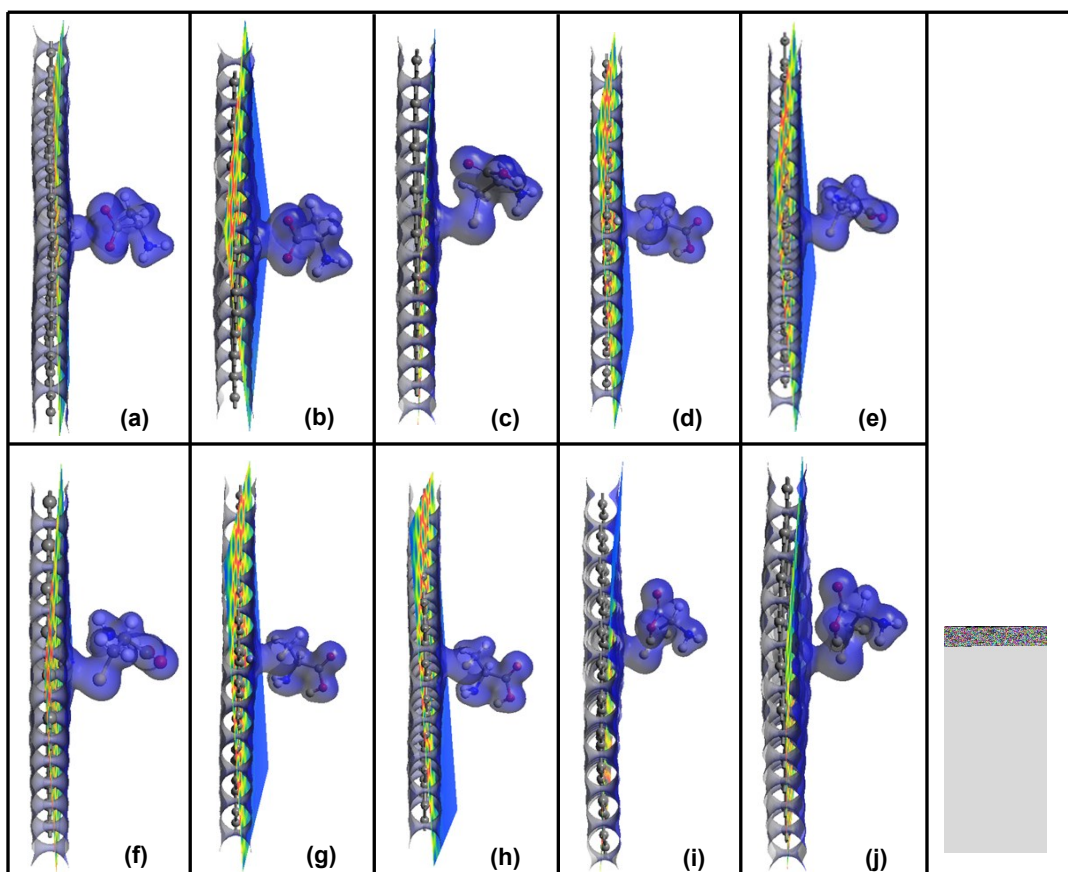

**Fig. S2** Charge density graphs of the most stable adsorption on MDVs. (a) O-ScDV, (b) O-TiDV, (c) S-VDV, (d) S-CrDV, (e) S-MnDV, (f) S-FeDV, (g) S-CoDV, (h) S-NiDV, (i) S-CuDV and (j) S-ZnDV. The electrons are shown in a range of 0-2  $e \text{ \AA}^3$ .

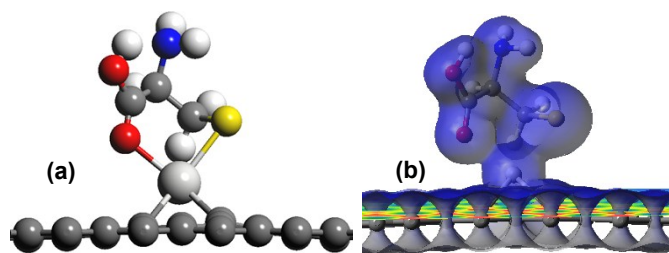

**Fig. S3** Adsorption geometry (a) and charge density distribution (b) of S-ScDV. The electrons are shown in a range of 0-2 e Å<sup>3</sup>.

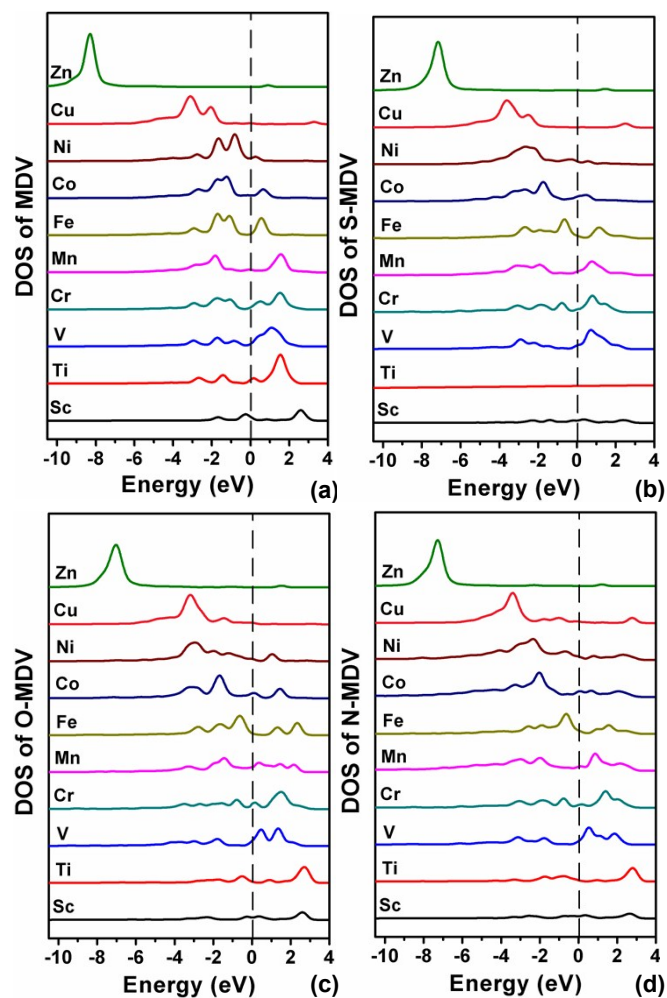

**Fig. S4** Partial density of states (DOS) of the 3d orbital of the TM dopant in MDV (a), S-MDV (b), O-MDV (c) and N-MDV (d).

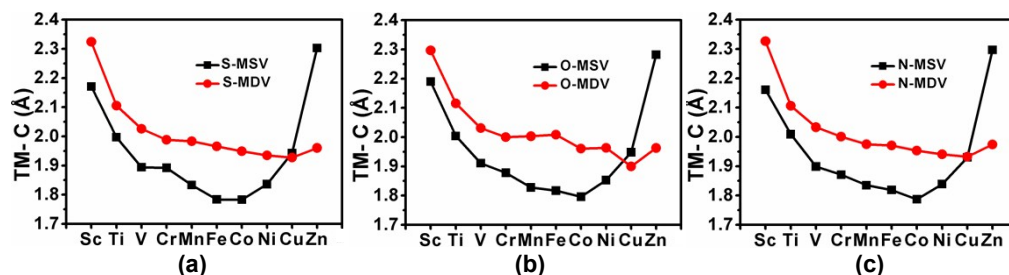

**Fig. S5** The TM-C bond lengths of (a) S-MG, (b) O-MG and (c) N-MG adducts.

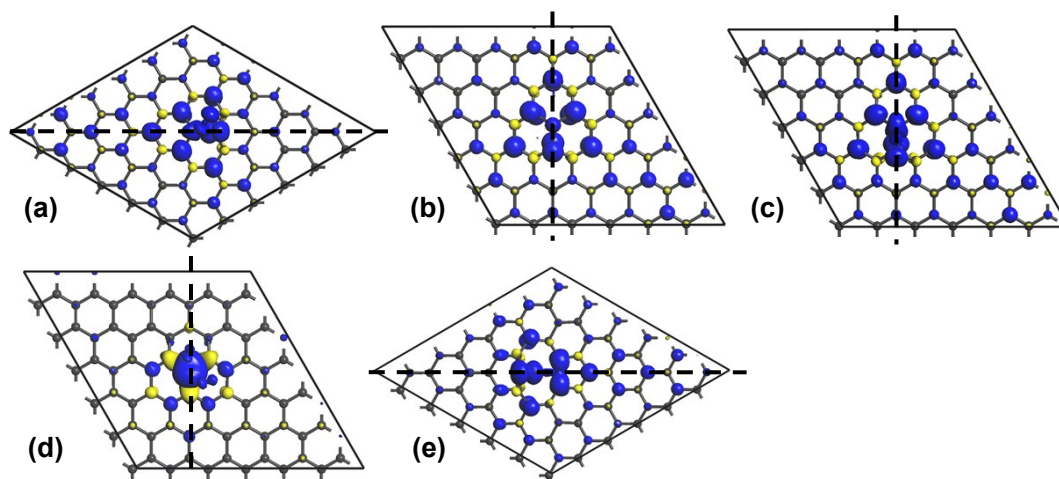

**Fig. S6** Top views of spin density distributions on graphenes in S-NiSV (a), O-NiSV (b), N-NiSV(c), O-FeSV (d) and N-ZnSV (e). The isovalue is  $0.01 e \text{ \AA}^3$ . The I-cys atoms were removed to illustrate the spin distribution on the MSV surface. The light yellow and dark blue surfaces correspond to majority and minority spins, respectively. The dashed line indicates the mirror line.

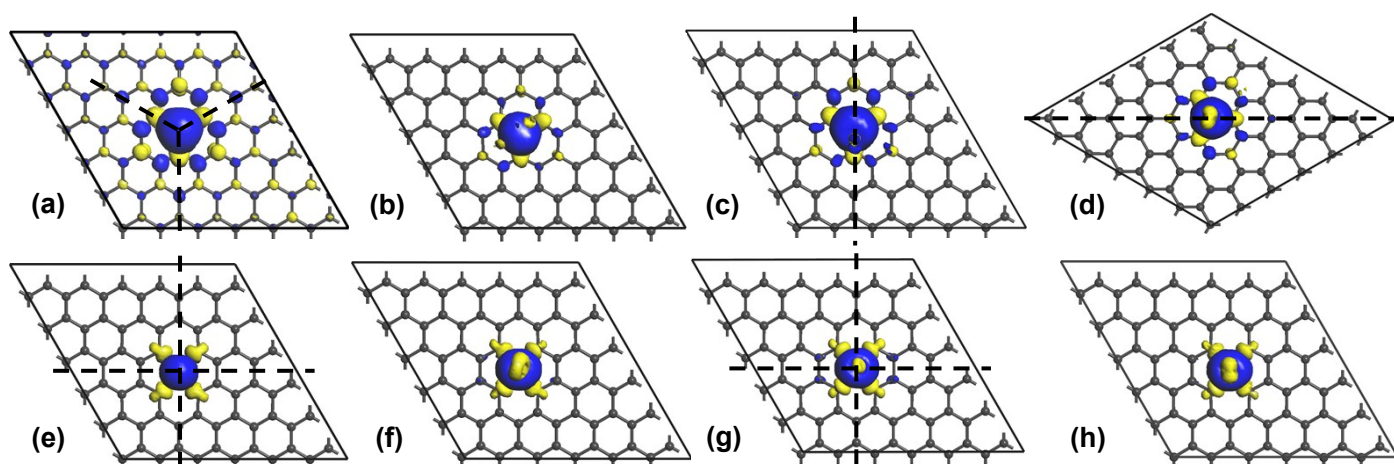

**Fig. S7** Top views of spin density distributions on graphenes in CrSV (a), S-CrSV (b), O-CrSV(c), N-CrSV (d) and CrDV (e), S-CrDV (f), O-CrDV (g), N-CrDV (h). The isovalue is  $0.01 e \text{ \AA}^3$ . The I-cys atoms in (b-d) and (f-h) were removed to illustrate the spin distribution on the MDV surface. The light yellow and dark blue surfaces correspond to majority and minority spins, respectively. The dashed line indicates the mirror line.

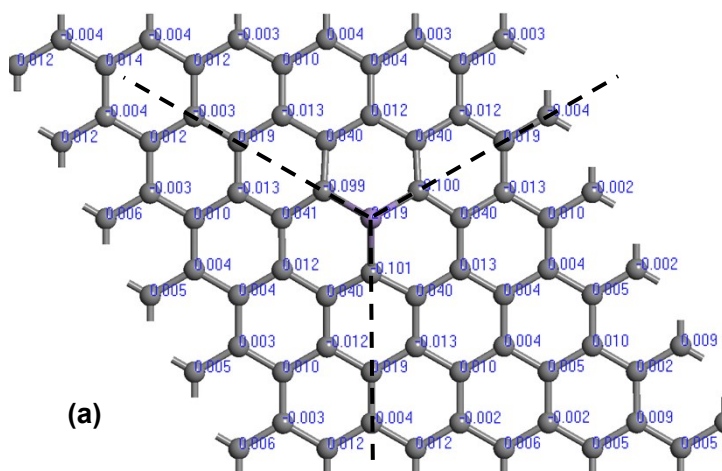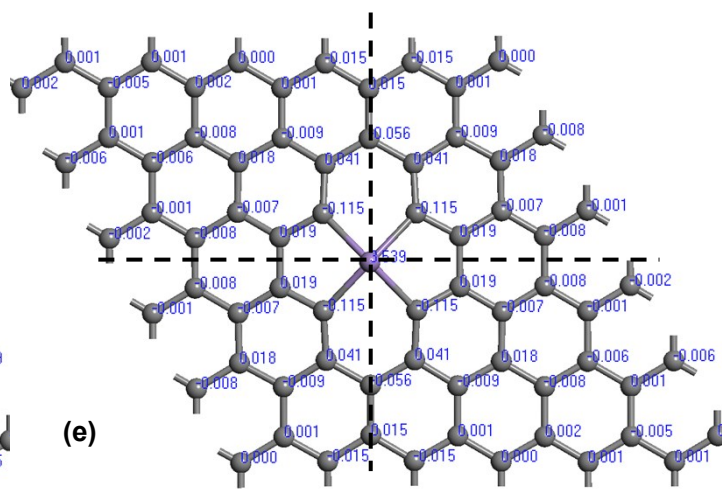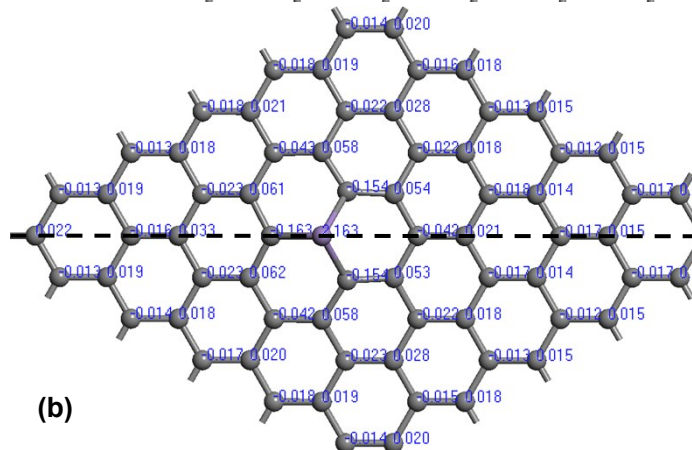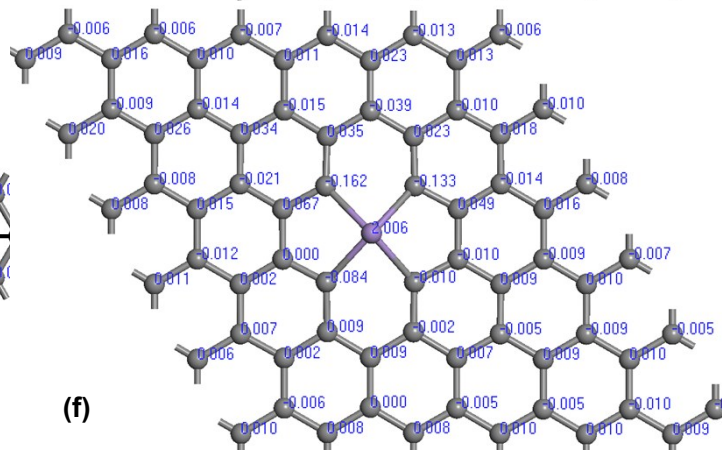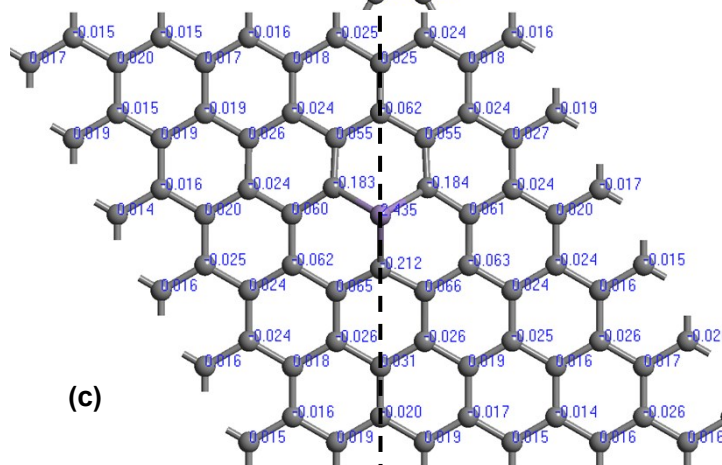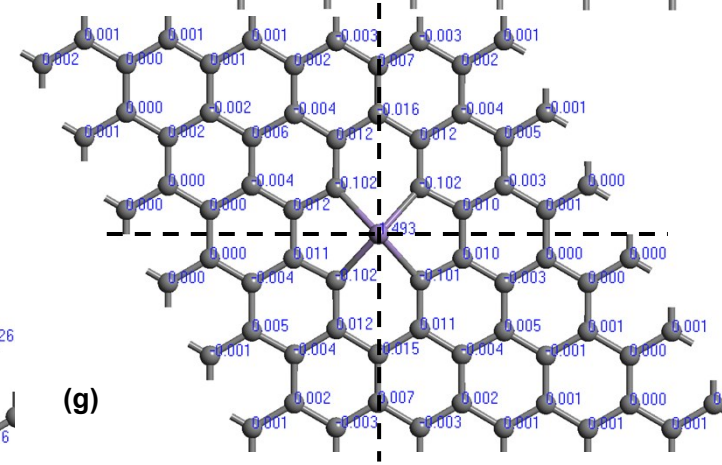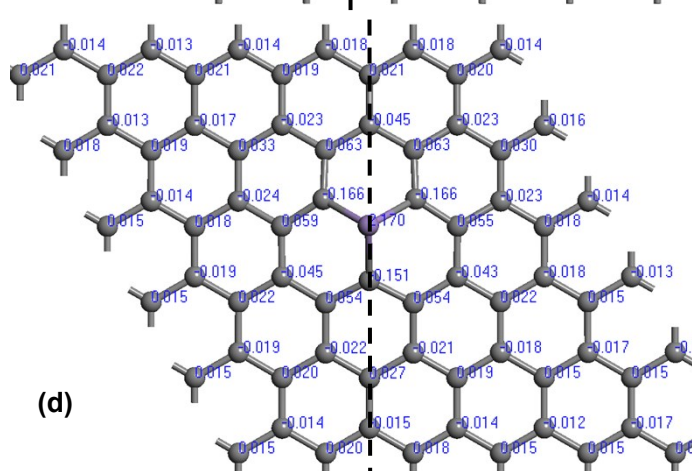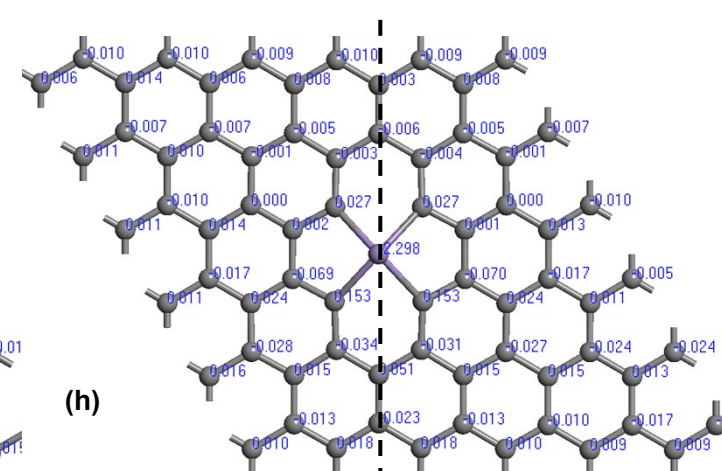

**Fig. S8** Mulliken spin population of the (a) MnSV, (b) S-MnSV, (c) O-MnSV, (d) N-MnSV and (e) MnDV, (f) S-MnDV, (g) O-MnDV, (h) N-MnDV systems, where atoms of l-cys were removed to illustrate the spin distribution on the MnG surface.
